# Supplementary material
Source: Springer Nature journal article supplement (https://www.springermedizin.de/resource/supplementary/12893_2008_114_MOESM1_ESM.pdf/9513014)

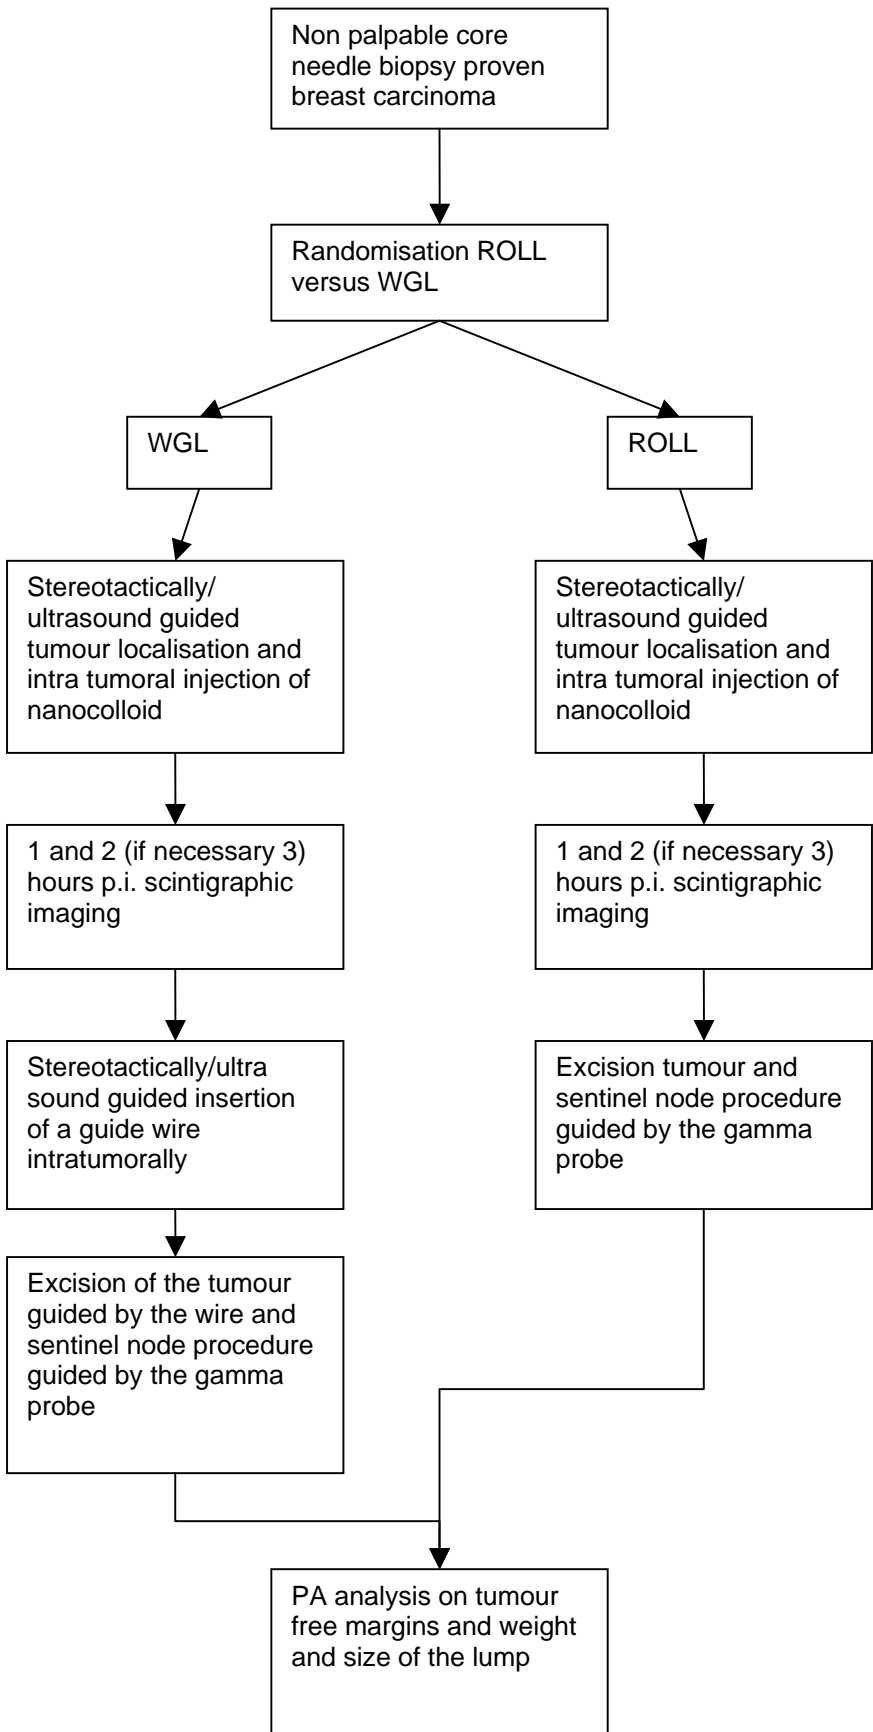

Supplement: MOESM1 [file 9513014]
